# Supplementary material for: Frictional interactions between tidal constituents in tide-dominated estuaries
Source: Copernicus journal article supplement (doi:10.5194/os-14-769-2018), 2018-08-08
Supplement: Supplementary file 1 [file os-14-769-2018-supplement.zip]

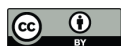

## *Supplement of*

# **Frictional interactions between tidal constituents in tide-dominated estuaries**

**Huayang Cai et al.**

*Correspondence to:* Erwan Garel (egarel@ualg.pt)

- os-14-769-2018-supplement-title-page.pdf
- Matlab\_scripts(OS)
  - Case01\_Guadiana
    - \* Example\_Guadiana.m
    - \* Obs\_Guadiana.txt
    - \* f\_linN.m
  - Case02\_Guadalquivir
    - \* Example\_Guadalquivir.m
    - \* Obs\_Guadalquivir.txt
    - \* f\_linN.m
  - readme.txt

The copyright of individual parts of the supplement might differ from the CC BY 4.0 License.
